# Supplementary material
Source: PubMed Central journal article supplement (PMC1820928)
Supplement: plntphys_pp.106.093864_4.pdf [file plntphys_pp.106.093864_4.pdf]

## Supplemental figure legends

**Figure S1.** Intracellular localization of AtAtg8 in Arabidopsis cells. A, Punctate localization of YFP-AtAtg8. B, CFP-AtAtg8 (left) and YFP vector controls (right) were expressed together in Arabidopsis protoplasts. CFP-AtAtg8 but not YFP vector controls exhibited punctate localization (arrow head).

**Figure S2.** Colocalization of AtAtg6 and AtAtg8 proteins in Arabidopsis cells. YFP-AtAtg8 and CFP-AtAtg6 were predominantly distributed throughout the cytoplasm and partly targeted to the punctate structures (arrows). However, it was difficult to detect punctate signals when cytoplasmic fluorescent signals were too strong or too faint (arrow heads). Shown are results of two independent experiments (Exp.1 and 2).

**Figure S3.** Reduced *AtATG6* mRNA levels in *AtATG6* heterozygous plants. RNA was isolated from leaves of 4-week-old wild-type (1) or *AtATG6* heterozygous (2) plants (SALK\_109281) and subjected to RT-PCR.
