# Supplementary material
Source: PubMed Central journal article supplement (PMC1820928)

**A**

**YFP-Atg8**

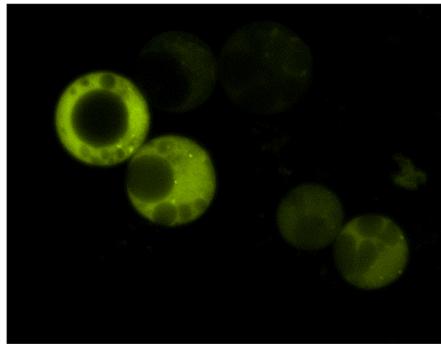

**B**

**CFP-Atg8**

**YFP-vector**

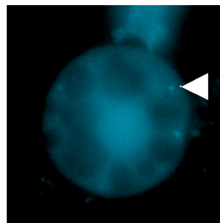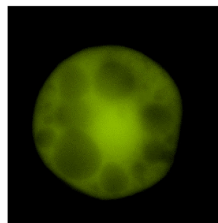

Supplement: plntphys_pp.106.093864_1.pdf [file plntphys_pp.106.093864_1.pdf]

Exp.1

Exp.2

Atg8

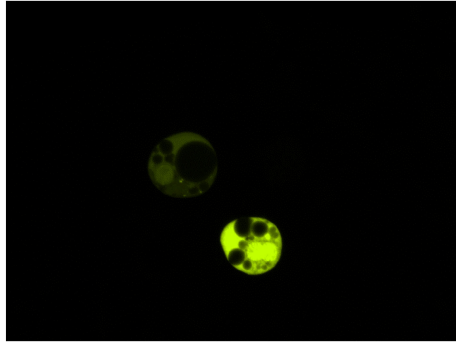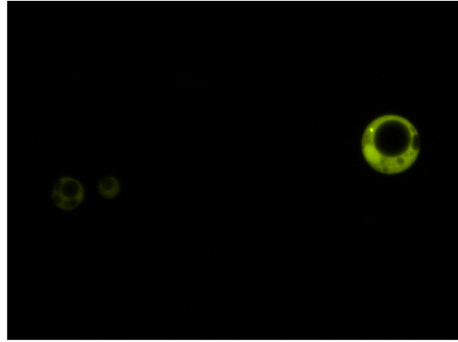

Atg6

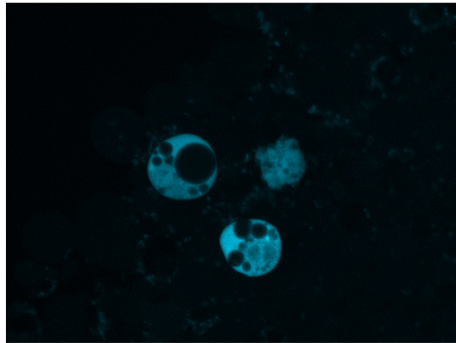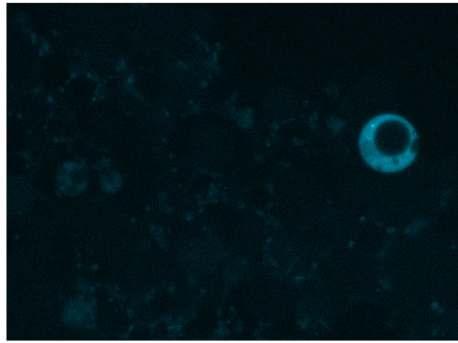

Merge

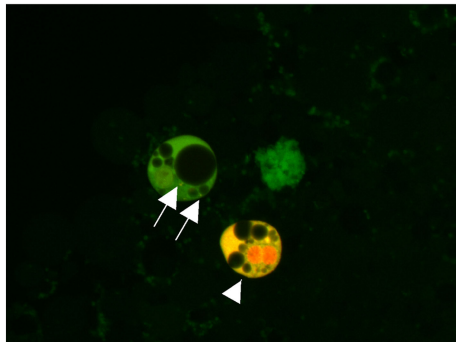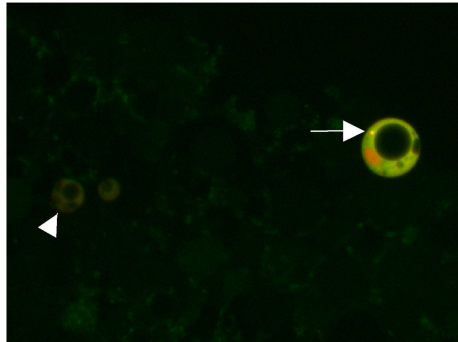

Supplement: plntphys_pp.106.093864_2.pdf [file plntphys_pp.106.093864_2.pdf]

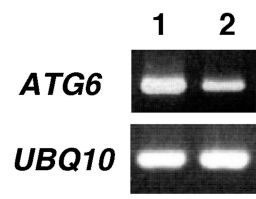

Supplement: plntphys_pp.106.093864_3.pdf [file plntphys_pp.106.093864_3.pdf]
